# Supplementary material for: Novel derivatives of hypervalent germanium: synthesis, structure, and stability
Source: Royal Society of Chemistry journal article supplement (doi:10.1039/b901885a), 2009-01-01
Supplement: b901885a.pdf [file b901885a.pdf]

# **Novel derivatives of hypervalent germanium: synthesis, structure, and stability**

**El'mira Kh. Lermontova, MengMeng Huan, Andrei V. Churakov, Judith A.K. Howard, Maxim V. Zabalov, Sergey S. Karlov, and Galina S. Zaitseva**

## **Supporting information**

**Calculated Cartesian coordinates of transition states and stable compounds, electronic energies, numbers of imaginary frequencies.**

## Compound I

| Atomic number | X           | Y           | Z           |
|---------------|-------------|-------------|-------------|
| 17            | -0.48786626 | -5.34406303 | -0.04207685 |
| 32            | 1.66850488  | -5.46620825 | 0.41882611  |
| 17            | 1.92665948  | -7.67651896 | 0.43937837  |
| 14            | 3.04304579  | -5.52509245 | -2.50292326 |
| 14            | 3.06433096  | -5.70739001 | 3.29729521  |
| 7             | 2.78839033  | -4.82825843 | -0.88141893 |
| 7             | 2.02737488  | -4.85541822 | 2.11486689  |
| 6             | 2.75799695  | -2.35191645 | -0.45973816 |
| 1             | 2.45648547  | -2.14775245 | -1.49745712 |
| 1             | 3.42962599  | -1.52458836 | -0.15062674 |
| 6             | 3.56858539  | -3.65670533 | -0.45433281 |
| 1             | 3.98361903  | -3.81771100 | 0.55416924  |
| 1             | 4.43591547  | -3.52659679 | -1.12133223 |
| 6             | 1.79470772  | -2.37592058 | 1.82406628  |
| 1             | 2.87346878  | -2.26255670 | 2.01869618  |
| 1             | 1.30598222  | -1.50279385 | 2.29647079  |
| 6             | 1.29546609  | -3.64395313 | 2.52765689  |
| 1             | 0.21636381  | -3.75649555 | 2.33663356  |
| 1             | 1.40406115  | -3.50931303 | 3.61431553  |
| 6             | 1.53843498  | -6.52903980 | -3.03625888 |
| 1             | 0.63102844  | -5.91187234 | -3.06486545 |
| 1             | 1.71843232  | -6.91433553 | -4.05123732 |
| 1             | 1.35021346  | -7.38743650 | -2.37998497 |
| 6             | 3.29079779  | -4.11057197 | -3.74307276 |
| 1             | 4.13610630  | -3.45599986 | -3.49051326 |
| 1             | 3.49595950  | -4.53663047 | -4.73644964 |
| 1             | 2.38704554  | -3.49149863 | -3.82741771 |
| 6             | 4.59429590  | -6.60905694 | -2.48943467 |
| 1             | 5.47493896  | -6.04248029 | -2.15463802 |
| 1             | 4.45970790  | -7.45929301 | -1.80690302 |
| 1             | 4.80994396  | -7.00473322 | -3.49255865 |
| 6             | 3.61306453  | -4.44371278 | 4.60479119  |
| 1             | 4.03499068  | -3.53450031 | 4.15507308  |
| 1             | 2.80693974  | -4.14995879 | 5.29032904  |
| 1             | 4.40318399  | -4.90737134 | 5.21460355  |
| 6             | 2.12747104  | -7.09627319 | 4.17196604  |
| 1             | 1.83240359  | -7.88175465 | 3.46425502  |
| 1             | 2.75009858  | -7.55362006 | 4.95492453  |
| 1             | 1.21548032  | -6.70734239 | 4.64672949  |
| 6             | 4.62412225  | -6.36825214 | 2.45776218  |
| 1             | 5.24348402  | -5.54690680 | 2.07058861  |
| 1             | 5.22342699  | -6.91853103 | 3.19837898  |
| 1             | 4.40081268  | -7.05387429 | 1.63155190  |
| 14            | 0.17596091  | -1.43805686 | -0.22922610 |
| 7             | 1.55144628  | -2.41596070 | 0.37179068  |
| 6             | -1.32527931 | -1.70136174 | 0.88768678  |
| 1             | -1.13296881 | -1.41084695 | 1.92952838  |
| 1             | -2.15369737 | -1.07664608 | 0.52240024  |
| 1             | -1.65810330 | -2.74712771 | 0.87253614  |
| 6             | 0.63262445  | 0.40662568  | -0.20944855 |
| 1             | 1.50422599  | 0.61058409  | -0.84781496 |
| 1             | -0.20304321 | 1.01602879  | -0.58327891 |
| 1             | 0.86986172  | 0.75598706  | 0.80570557  |
| 6             | -0.23337466 | -1.95410489 | -2.00080611 |
| 1             | 0.51365156  | -1.60780145 | -2.72799167 |
| 1             | -0.32096362 | -3.04544409 | -2.07810719 |
| 1             | -1.19834302 | -1.51297706 | -2.29056239 |

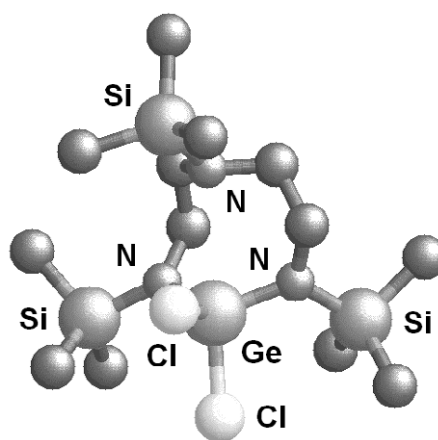

Energy = -4545.23612683 Hartree

Number of imaginary frequencies = 0.

## Compound II

| Atomic number | X           | Y            | Z           |
|---------------|-------------|--------------|-------------|
| 32            | 6.15548781  | -5.77082584  | -0.40874684 |
| 17            | 6.20284139  | -7.75954691  | -1.60386052 |
| 14            | 7.32423705  | -8.08689147  | 1.67423314  |
| 14            | 8.13434753  | -5.16923013  | -2.99231734 |
| 7             | 6.84943169  | -6.42704352  | 1.20594609  |
| 7             | 7.10019859  | -4.69269155  | -1.61659785 |
| 7             | 5.78142386  | -3.96819060  | 0.66422725  |
| 6             | 6.16331774  | -4.23567453  | 2.07040120  |
| 1             | 5.28654240  | -4.61582299  | 2.61212688  |
| 1             | 6.48788267  | -3.30913821  | 2.56625645  |
| 6             | 7.26163178  | -5.30018429  | 2.06156102  |
| 1             | 8.21568029  | -4.85421681  | 1.71952156  |
| 1             | 7.42462275  | -5.63481185  | 3.09395349  |
| 6             | 6.62525288  | -2.93571983  | 0.02797173  |
| 1             | 7.62299732  | -2.97324455  | 0.49304425  |
| 1             | 6.20609225  | -1.93103422  | 0.18828887  |
| 6             | 6.75913764  | -3.26843727  | -1.45332422 |
| 1             | 5.81900723  | -3.00474878  | -1.97201873 |
| 1             | 7.54710247  | -2.63083676  | -1.87610739 |
| 6             | 5.88849518  | -9.31400997  | 1.55265318  |
| 1             | 5.04880269  | -9.00595984  | 2.19137949  |
| 1             | 6.23237003  | -10.29769002 | 1.90685472  |
| 1             | 5.52720557  | -9.43300257  | 0.52474549  |
| 6             | 7.81579680  | -8.03261437  | 3.51131282  |
| 1             | 8.72383432  | -7.44351323  | 3.69866848  |
| 1             | 8.02635874  | -9.06441416  | 3.83118786  |
| 1             | 7.01112046  | -7.65163169  | 4.15602190  |
| 6             | 8.82601255  | -8.74211478  | 0.72892302  |
| 1             | 9.66148978  | -8.02951026  | 0.77032572  |
| 1             | 8.58874412  | -8.93307752  | -0.32444262 |
| 1             | 9.16608219  | -9.68654246  | 1.17968661  |
| 6             | 9.12981612  | -3.63479153  | -3.51411725 |
| 1             | 9.70891384  | -3.20688522  | -2.68355218 |
| 1             | 8.50878992  | -2.84205289  | -3.95296831 |
| 1             | 9.84959239  | -3.94613632  | -4.28622462 |
| 6             | 7.13540560  | -5.71890353  | -4.50561585 |
| 1             | 6.54902885  | -6.62128650  | -4.29151308 |
| 1             | 7.81059397  | -5.94011394  | -5.34590143 |
| 1             | 6.44704347  | -4.92622875  | -4.83333133 |
| 6             | 9.39168831  | -6.49048056  | -2.50367582 |
| 1             | 9.97382494  | -6.16994595  | -1.62877824 |
| 1             | 10.09277187 | -6.64723546  | -3.33695613 |
| 1             | 8.91728308  | -7.45055102  | -2.72729827 |
| 32            | 3.80047863  | -3.81301977  | 0.40986897  |
| 17            | 3.75194469  | -1.82507272  | 1.60632342  |
| 14            | 2.63260919  | -1.49633386  | -1.67335183 |
| 14            | 1.82227424  | -4.41552770  | 2.99398116  |
| 7             | 3.10835139  | -3.15605408  | -1.20533845 |
| 7             | 2.85581810  | -4.89147369  | 1.61754162  |
| 7             | 4.17451737  | -5.61535015  | -0.66336950 |
| 6             | 3.79345675  | -5.34778388  | -2.06978258 |
| 1             | 4.67074224  | -4.96845546  | -2.61123779 |
| 1             | 3.46831758  | -6.27416434  | -2.56554550 |
| 6             | 2.69592194  | -4.28248152  | -2.06144549 |
| 1             | 1.74131204  | -4.72787778  | -1.72021941 |
| 1             | 2.53395004  | -3.94740526  | -3.09386368 |
| 6             | 3.33018406  | -6.64771011  | -0.02760295 |
| 1             | 2.33228933  | -6.60906683  | -0.49226916 |
| 1             | 3.74857445  | -7.65257172  | -0.18876092 |
| 6             | 3.19718579  | -6.31560725  | 1.45382341  |
| 1             | 4.13786128  | -6.57900399  | 1.97168813  |
| 1             | 2.40987557  | -6.95359189  | 1.87720708  |
| 6             | 4.06425137  | -0.26536678  | -1.54275765 |
| 1             | 4.90810656  | -0.57027800  | -2.17751577 |
| 1             | 3.71911351  | 0.71745438   | -1.89815013 |
| 1             | 4.41984316  | -0.14612877  | -0.51295455 |
| 6             | 2.15014196  | -1.54866007  | -3.51269986 |
| 1             | 1.24337688  | -2.13801831  | -3.70528788 |
| 1             | 1.94071388  | -0.51663330  | -3.83257794 |
| 1             | 2.95830075  | -1.92862940  | -4.15365612 |
| 6             | 1.12466383  | -0.84851998  | -0.73274490 |

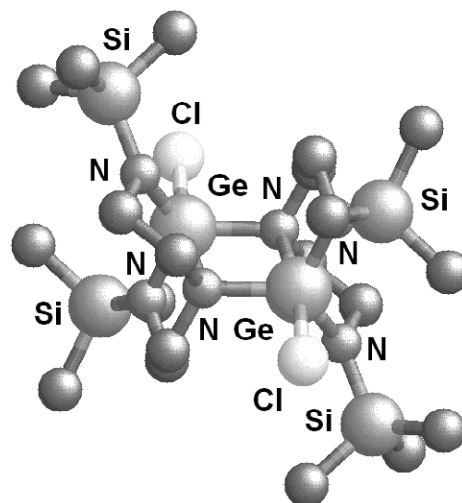

|   |             |             |             |
|---|-------------|-------------|-------------|
| 1 | 0.29168320  | -1.56367149 | -0.78037696 |
| 1 | 1.35699890  | -0.66113855 | 0.32239557  |
| 1 | 0.78344886  | 0.09664573  | -1.18103842 |
| 6 | 0.82652791  | -5.95005659 | 3.51499276  |
| 1 | 0.24665640  | -6.37674493 | 2.68433139  |
| 1 | 1.44734123  | -6.74360926 | 3.95264461  |
| 1 | 0.10736231  | -5.63911231 | 4.28783723  |
| 6 | 2.82202113  | -3.86704823 | 4.50718851  |
| 1 | 3.41002447  | -2.96588347 | 4.29241530  |
| 1 | 2.14715535  | -3.64374390 | 5.34718375  |
| 1 | 3.50873459  | -4.66081978 | 4.83562246  |
| 6 | 0.56494098  | -3.09367613 | 2.50691333  |
| 1 | -0.01648994 | -3.41265377 | 1.63097879  |
| 1 | -0.13678091 | -2.93870212 | 3.33998726  |
| 1 | 1.03929808  | -2.13307115 | 2.27836373  |

Energy = -7352.29516409 Hartree

Number of imaginary frequencies = 0.

### Compound III

| Atomic number | X          | Y           | Z           |
|---------------|------------|-------------|-------------|
| 32            | 4.47703905 | -5.10430001 | -0.55842888 |
| 17            | 6.39233637 | -6.11049508 | -0.95310369 |
| 14            | 3.78859572 | -6.75005275 | 2.25517804  |
| 14            | 3.09916960 | -6.60724899 | -3.12589898 |
| 7             | 4.02473673 | -5.33396481 | 1.21962343  |
| 7             | 3.33364750 | -5.25206494 | -2.00844954 |
| 7             | 4.43167575 | -3.23508750 | -0.51404458 |
| 6             | 4.27642945 | -2.90751965 | 0.91481935  |
| 1             | 5.27846124 | -2.82086035 | 1.36231553  |
| 1             | 3.77098343 | -1.93715293 | 1.03162056  |
| 6             | 3.49777834 | -4.01877973 | 1.65780929  |
| 1             | 2.41401180 | -3.92294163 | 1.45752727  |
| 1             | 3.63814456 | -3.89965156 | 2.74318148  |
| 6             | 3.27302416 | -2.87988973 | -1.35668863 |
| 1             | 2.31804982 | -2.93199340 | -0.79725511 |
| 1             | 3.38085301 | -1.85364199 | -1.74482107 |
| 6             | 3.20731751 | -3.86696308 | -2.52938010 |
| 1             | 4.01000352 | -3.62371860 | -3.24996377 |
| 1             | 2.24417044 | -3.74528179 | -3.04773721 |
| 6             | 4.75058731 | -8.22060899 | 1.57086395  |
| 1             | 5.82482793 | -8.00568305 | 1.50849498  |
| 1             | 4.61181896 | -9.07806625 | 2.24615930  |
| 1             | 4.40444120 | -8.52737241 | 0.57595702  |
| 6             | 4.42838399 | -6.34522964 | 3.99344309  |
| 1             | 3.82898690 | -5.57454442 | 4.49724107  |
| 1             | 4.39076818 | -7.24739253 | 4.62182765  |
| 1             | 5.47147190 | -6.00241360 | 3.95732472  |
| 6             | 1.94558787 | -7.18123761 | 2.37500925  |
| 1             | 1.36256734 | -6.33338407 | 2.76264990  |
| 1             | 1.53597486 | -7.44731682 | 1.39047649  |
| 1             | 1.78312210 | -8.03292029 | 3.05144680  |
| 6             | 1.35894098 | -6.46459652 | -3.86229064 |
| 1             | 0.59656147 | -6.41623696 | -3.07292750 |
| 1             | 1.25063217 | -5.57621865 | -4.49993696 |
| 1             | 1.14337908 | -7.34259213 | -4.48868746 |
| 6             | 4.36511253 | -6.58612636 | -4.53426638 |
| 1             | 5.38764294 | -6.66496329 | -4.14031348 |
| 1             | 4.19717700 | -7.42788365 | -5.22196029 |
| 1             | 4.29778907 | -5.65958120 | -5.12198799 |
| 6             | 3.25165157 | -8.21381151 | -2.14697100 |
| 1             | 2.55494095 | -8.23611731 | -1.29787735 |
| 1             | 3.01229766 | -9.06640601 | -2.79794797 |
| 1             | 4.27370909 | -8.36248822 | -1.77273080 |

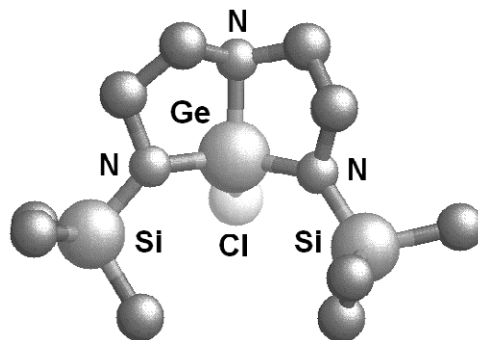

Energy = -3676.13029045 Hartree

Number of imaginary frequencies = 0.

## Compound Me3SiCl

| Atomic number | X          | Y           | Z           |
|---------------|------------|-------------|-------------|
| 14            | 3.91380628 | -4.36760851 | 0.27480125  |
| 17            | 5.65062880 | -5.58268420 | 0.28916323  |
| 6             | 2.91876034 | -4.81162815 | 1.81008110  |
| 1             | 3.50186619 | -4.62292210 | 2.72089861  |
| 1             | 1.99926080 | -4.20977482 | 1.85899728  |
| 1             | 2.63522734 | -5.87213703 | 1.79775564  |
| 6             | 4.49438634 | -2.57698448 | 0.31060239  |
| 1             | 5.11786428 | -2.35161515 | -0.56444531 |
| 1             | 3.63234766 | -1.89365072 | 0.30437249  |
| 1             | 5.08537041 | -2.37650024 | 1.21379155  |
| 6             | 2.97517030 | -4.76765535 | -1.30747525 |
| 1             | 3.59071805 | -4.55351773 | -2.19091098 |
| 1             | 2.69197724 | -5.82795406 | -1.33549134 |
| 1             | 2.05761563 | -4.16436657 | -1.37254061 |

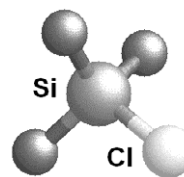

Energy = -869.09762433 Hartree

Number of imaginary frequencies = 0.

## Compound TS1

| Atomic number | X          | Y            | Z           |
|---------------|------------|--------------|-------------|
| 17            | 3.34586079 | -7.16621478  | -0.98761043 |
| 32            | 5.86981015 | -7.49314695  | -0.29828243 |
| 17            | 5.29891743 | -9.66936896  | -0.19668654 |
| 14            | 7.48229585 | -8.76042834  | -2.88773267 |
| 14            | 6.88427485 | -8.47954935  | 2.69282062  |
| 7             | 6.86338012 | -7.43454265  | -1.86421117 |
| 7             | 6.61459258 | -7.27523418  | 1.39332427  |
| 6             | 5.89452098 | -5.18497755  | -1.78501306 |
| 1             | 5.03681758 | -5.41017252  | -2.43377139 |
| 1             | 6.13175935 | -4.11595671  | -1.87752429 |
| 6             | 7.08534216 | -6.03716697  | -2.24661968 |
| 1             | 8.02753325 | -5.64062958  | -1.82124567 |
| 1             | 7.16639779 | -5.92721400  | -3.33745015 |
| 6             | 6.47562197 | -4.93976082  | 0.57354672  |
| 1             | 7.45332758 | -4.81199683  | 0.08015983  |
| 1             | 6.14508683 | -3.94267110  | 0.90573048  |
| 6             | 6.65478549 | -5.86024726  | 1.79101851  |
| 1             | 5.89045174 | -5.63353647  | 2.55178706  |
| 1             | 7.62953918 | -5.61203778  | 2.23866392  |
| 6             | 6.08652315 | -9.64620500  | -3.80392275 |
| 1             | 5.50842649 | -8.93528911  | -4.41063911 |
| 1             | 6.49717903 | -10.41345035 | -4.47707297 |
| 1             | 5.39698066 | -10.13627260 | -3.10529061 |
| 6             | 8.63139252 | -7.97099758  | -4.17825509 |
| 1             | 9.41109876 | -7.34870197  | -3.71797666 |
| 1             | 9.13574571 | -8.77717323  | -4.73176944 |
| 1             | 8.09192869 | -7.36123993  | -4.91591960 |
| 6             | 8.51418163 | -9.98769635  | -1.88837841 |
| 1             | 9.33934344 | -9.47591240  | -1.37420322 |
| 1             | 7.91248397 | -10.51386540 | -1.13791275 |
| 1             | 8.94903996 | -10.74049584 | -2.56241745 |
| 6             | 7.84496818 | -7.58490956  | 4.06653147  |
| 1             | 8.81729294 | -7.21048197  | 3.71712754  |
| 1             | 7.28683467 | -6.74636107  | 4.50412973  |
| 1             | 8.04264920 | -8.30489692  | 4.87469325  |
| 6             | 5.25520845 | -9.08980914  | 3.43720160  |
| 1             | 4.64601821 | -9.61574903  | 2.69144201  |
| 1             | 5.45262472 | -9.78126938  | 4.26976513  |
| 1             | 4.66586821 | -8.25052217  | 3.83343794  |
| 6             | 7.96042975 | -9.92155137  | 2.12109210  |
| 1             | 8.87887215 | -9.55509039  | 1.64276621  |
| 1             | 8.25193713 | -10.51894902 | 2.99781873  |
| 1             | 7.44076625 | -10.58079780 | 1.41712522  |
| 14            | 3.32137451 | -5.00081610  | -0.10628299 |
| 7             | 5.50833203 | -5.51329565  | -0.38746987 |
| 6             | 3.36786955 | -5.13832722  | 1.78297350  |
| 1             | 4.10360164 | -4.46693053  | 2.24209290  |
| 1             | 2.37497011 | -4.86219509  | 2.16416540  |
| 1             | 3.57194415 | -6.16578697  | 2.10923798  |
| 6             | 3.75343825 | -3.25849481  | -0.76935389 |
| 1             | 3.63700729 | -3.20505303  | -1.86058228 |
| 1             | 3.00259831 | -2.57806674  | -0.34032192 |
| 1             | 4.74719031 | -2.87693849  | -0.50745196 |
| 6             | 1.44508738 | -4.97363263  | -0.52823872 |
| 1             | 1.26987762 | -4.97033503  | -1.61350511 |
| 1             | 0.91879626 | -5.84012281  | -0.10663300 |
| 1             | 0.99130044 | -4.05896298  | -0.11450736 |

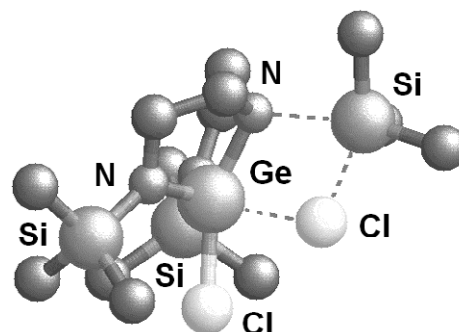

Energy = -4545.18993543 Hartree

Number of imaginary frequencies = 1.

## Compound TS2

| Atomic number | X           | Y            | Z           |
|---------------|-------------|--------------|-------------|
| 32            | 6.76643049  | -5.78454788  | -0.14057437 |
| 17            | 6.10722115  | -7.59208041  | -1.28632277 |
| 14            | 7.92029855  | -8.18240332  | 1.87102796  |
| 14            | 8.52105270  | -5.24059258  | -2.89721803 |
| 7             | 7.40792192  | -6.53675082  | 1.43516618  |
| 7             | 7.75849185  | -4.79131078  | -1.35719668 |
| 7             | 6.10905367  | -4.21620768  | 0.74009948  |
| 6             | 6.12680210  | -4.56914475  | 2.16679339  |
| 1             | 5.18171390  | -5.08162104  | 2.40608389  |
| 1             | 6.17735300  | -3.65952959  | 2.78275504  |
| 6             | 7.29614094  | -5.52008094  | 2.49917234  |
| 1             | 8.23600933  | -4.94944579  | 2.60891808  |
| 1             | 7.09312906  | -5.98797608  | 3.47464101  |
| 6             | 7.10017055  | -3.18534123  | 0.37955438  |
| 1             | 8.02402028  | -3.26147468  | 0.98592984  |
| 1             | 6.66803278  | -2.18496351  | 0.54326155  |
| 6             | 7.46706181  | -3.36445090  | -1.09515492 |
| 1             | 6.63691796  | -2.99058298  | -1.72479041 |
| 1             | 8.34873266  | -2.74512589  | -1.31528478 |
| 6             | 6.41983646  | -9.25896212  | 2.29354537  |
| 1             | 5.81422047  | -8.79663212  | 3.08625441  |
| 1             | 6.73175888  | -10.25372847 | 2.64433131  |
| 1             | 5.77990393  | -9.39252810  | 1.41073773  |
| 6             | 9.03019980  | -8.04959034  | 3.40560173  |
| 1             | 9.85338895  | -7.33951705  | 3.24585052  |
| 1             | 9.47365363  | -9.03431219  | 3.61484927  |
| 1             | 8.48225710  | -7.74004091  | 4.30570945  |
| 6             | 8.93174775  | -9.00019243  | 0.50314848  |
| 1             | 9.81234819  | -8.39706974  | 0.24505872  |
| 1             | 8.34394879  | -9.16701459  | -0.40708380 |
| 1             | 9.28681437  | -9.97867676  | 0.85968746  |
| 6             | 9.74646923  | -3.86284658  | -3.34517035 |
| 1             | 10.46396126 | -3.67680666  | -2.53391244 |
| 1             | 9.24514842  | -2.91641404  | -3.58941769 |
| 1             | 10.32040461 | -4.16766851  | -4.23280264 |
| 6             | 7.26454119  | -5.38982496  | -4.30876354 |
| 1             | 6.55399836  | -6.20515980  | -4.11846753 |
| 1             | 7.77676681  | -5.59831175  | -5.25988566 |
| 1             | 6.69341340  | -4.45899321  | -4.43579911 |
| 6             | 9.47388128  | -6.85814929  | -2.71191442 |
| 1             | 10.23154717 | -6.78055201  | -1.92067959 |
| 1             | 9.99133827  | -7.08635758  | -3.65533427 |
| 1             | 8.81295389  | -7.70210383  | -2.48033305 |
| 32            | 3.18435119  | -3.79464062  | 0.14459093  |
| 17            | 3.84782617  | -1.98329491  | 1.27784547  |
| 14            | 2.03628177  | -1.41280214  | -1.88409016 |
| 14            | 1.42642334  | -4.32866595  | 2.90031364  |
| 7             | 2.54368398  | -3.05736992  | -1.43807702 |
| 7             | 2.19357036  | -4.78434456  | 1.36448231  |
| 7             | 3.85709249  | -5.36442904  | -0.72196537 |
| 6             | 3.83649921  | -5.02335861  | -2.15228253 |
| 1             | 4.77761656  | -4.50578341  | -2.39581843 |
| 1             | 3.79285393  | -5.93881084  | -2.75980245 |
| 6             | 2.66010922  | -4.08436941  | -2.49201600 |
| 1             | 1.72391856  | -4.66273790  | -2.59278083 |
| 1             | 2.85711106  | -3.62520830  | -3.47263058 |
| 6             | 2.87281726  | -6.40040770  | -0.35439700 |
| 1             | 1.95079291  | -6.33666619  | -0.96461455 |
| 1             | 3.31371707  | -7.39837538  | -0.50805956 |
| 6             | 2.49946631  | -6.21081653  | 1.11718097  |
| 1             | 3.33096108  | -6.57087933  | 1.75313279  |
| 1             | 1.62300492  | -6.83653673  | 1.34012998  |
| 6             | 3.53924369  | -0.32998198  | -2.28062901 |
| 1             | 4.15856644  | -0.78883740  | -3.06469337 |
| 1             | 3.22881715  | 0.66425034   | -2.63431937 |
| 1             | 4.16485076  | -0.19578592  | -1.38776134 |
| 6             | 0.95446244  | -1.54893851  | -3.43835554 |
| 1             | 0.13423704  | -2.26613150  | -3.29627981 |
| 1             | 0.50685260  | -0.56689180  | -3.65149684 |
| 1             | 1.52103923  | -1.84977880  | -4.32983966 |
| 6             | 0.99951314  | -0.60253659  | -0.53081160 |

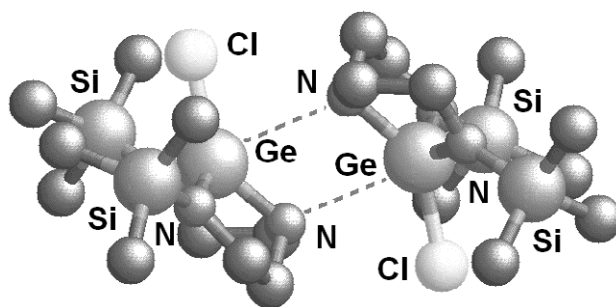



|   |             |             |             |
|---|-------------|-------------|-------------|
| 1 | 0.11661364  | -1.20928385 | -0.29063552 |
| 1 | 1.57241238  | -0.44004017 | 0.38999725  |
| 1 | 0.64825442  | 0.37785598  | -0.88590851 |
| 6 | 0.19773994  | -5.70338706 | 3.34827097  |
| 1 | -0.51580527 | -5.89162408 | 2.53406759  |
| 1 | 0.69688077  | -6.64944222 | 3.59832642  |
| 1 | -0.38016318 | -5.39495961 | 4.23205531  |
| 6 | 2.67859503  | -4.17434309 | 4.31493249  |
| 1 | 3.39269751  | -3.36290028 | 4.12085414  |
| 1 | 2.16352984  | -3.95616078 | 5.26234022  |
| 1 | 3.24612420  | -5.10587475 | 4.45217045  |
| 6 | 0.47739541  | -2.71004341 | 2.70593071  |
| 1 | -0.27217504 | -2.78514566 | 1.90685005  |
| 1 | -0.04943982 | -2.48229514 | 3.64425303  |
| 1 | 1.14200164  | -1.86674317 | 2.48246982  |

Energy = -7352.25087103 Hartree

Number of imaginary frequencies = 1.
